# Supplementary material for: Structural Characterization of the Loop at the Alpha-Subunit C-Terminus of the Mixed Lineage Leukemia Protein Activating Protease Taspase1
Source: PLoS One. 2016 Mar 14;11(3):e0151431. doi: 10.1371/journal.pone.0151431 (PMC4790943; doi:10.1371/journal.pone.0151431)
Supplement: S1 File — (PDB) [file pone.0151431.s007.pdb]

ATOM      1  N   PRO B   1     119.729  46.861  56.864  1.00-21.35           N  
ATOM      2  CA  PRO B   1     118.847  47.914  56.296  1.00-21.35           C  
ATOM      3  C   PRO B   1     118.788  49.119  57.229  1.00-21.35           C  
ATOM      4  O   PRO B   1     118.884  48.928  58.437  1.00-21.35           O  
ATOM      5  CB  PRO B   1     117.482  47.262  56.112  1.00-21.35           C  
ATOM      6  CG  PRO B   1     117.881  45.802  55.898  1.00-21.35           C  
ATOM      7  CD  PRO B   1     119.041  45.557  56.845  1.00-21.35           C  
ATOM      8  HA  PRO B   1     119.236  48.212  55.323  1.00-21.35           H  
ATOM      9  HB2 PRO B   1     116.879  47.375  57.015  1.00-21.35           H  
ATOM     10  HB3 PRO B   1     116.966  47.663  55.239  1.00-21.35           H  
ATOM     11  HG2 PRO B   1     117.051  45.131  56.124  1.00-21.35           H  
ATOM     12  HG3 PRO B   1     118.208  45.659  54.866  1.00-21.35           H  
ATOM     13  HD2 PRO B   1     118.669  45.311  57.842  1.00-21.35           H  
ATOM     14  HD3 PRO B   1     119.696  44.766  56.472  1.00-21.35           H  
ATOM     15  H1  PRO B   1     120.588  46.820  56.320  1.00-21.35           H  
ATOM     16  H2  PRO B   1     119.976  47.107  57.820  1.00-21.35           H  
ATOM     17  N   PRO B   2     118.674  50.349  56.695  1.00 -1.28           N  
ATOM     18  CA  PRO B   2     118.708  51.534  57.566  1.00 -1.28           C  
ATOM     19  C   PRO B   2     117.665  51.560  58.673  1.00 -1.28           C  
ATOM     20  O   PRO B   2     117.959  51.932  59.806  1.00 -1.28           O  
ATOM     21  CB  PRO B   2     118.445  52.682  56.589  1.00 -1.28           C  
ATOM     22  CG  PRO B   2     118.933  52.181  55.304  1.00 -1.28           C  
ATOM     23  CD  PRO B   2     118.549  50.743  55.280  1.00 -1.28           C  
ATOM     24  HA  PRO B   2     119.698  51.633  58.009  1.00 -1.28           H  
ATOM     25  HB2 PRO B   2     117.378  52.898  56.530  1.00 -1.28           H  
ATOM     26  HB3 PRO B   2     118.993  53.574  56.885  1.00 -1.28           H  
ATOM     27  HG2 PRO B   2     118.474  52.722  54.476  1.00 -1.28           H  
ATOM     28  HG3 PRO B   2     120.018  52.270  55.265  1.00 -1.28           H  
ATOM     29  HD2 PRO B   2     117.523  50.619  54.942  1.00 -1.28           H  
ATOM     30  HD3 PRO B   2     119.239  50.185  54.646  1.00 -1.28           H  
ATOM     31  N   ASN B   3     116.456  51.133  58.351  1.00 13.61           N  
ATOM     32  CA  ASN B   3     115.372  51.036  59.314  1.00 13.61           C  
ATOM     33  C   ASN B   3     114.647  49.759  58.940  1.00 13.61           C  
ATOM     34  O   ASN B   3     114.756  49.301  57.795  1.00 13.61           O  
ATOM     35  CB  ASN B   3     114.450  52.256  59.213  1.00 13.61           C  
ATOM     36  CG  ASN B   3     115.073  53.492  59.799  1.00 13.61           C  
ATOM     37  ND2 ASN B   3     115.087  53.566  61.100  1.00 13.61           N  
ATOM     38  OD1 ASN B   3     115.557  54.364  59.090  1.00 13.61           O  
ATOM     39  H   ASN B   3     116.256  50.847  57.404  1.00 13.61           H  
ATOM     40  HA  ASN B   3     115.758  50.950  60.331  1.00 13.61           H  
ATOM     41  HB2 ASN B   3     114.209  52.446  58.173  1.00 13.61           H  
ATOM     42  HB3 ASN B   3     113.526  52.058  59.751  1.00 13.61           H  
ATOM     43 HD21 ASN B   3     114.670  52.830  61.648  1.00 13.61           H  
ATOM     44 HD22 ASN B   3     115.529  54.360  61.546  1.00 13.61           H  
ATOM     45  N   ILE B   4     113.892  49.192  59.867  1.00-13.43           N  
ATOM     46  CA  ILE B   4     113.168  47.949  59.601  1.00-13.43           C  
ATOM     47  C   ILE B   4     112.050  48.211  58.593  1.00-13.43           C  
ATOM     48  O   ILE B   4     111.690  47.347  57.800  1.00-13.43           O  
ATOM     49  CB  ILE B   4     112.647  47.291  60.918  1.00-13.43           C  
ATOM     50  CG1 ILE B   4     111.551  48.147  61.590  1.00-13.43           C  
ATOM     51  CG2 ILE B   4     113.845  47.046  61.872  1.00-13.43           C  
ATOM     52  CD1 ILE B   4     110.951  47.582  62.875  1.00-13.43           C  
ATOM     53  H   ILE B   4     113.828  49.617  60.793  1.00-13.43           H  
ATOM     54  HA  ILE B   4     113.864  47.251  59.136  1.00-13.43           H  
ATOM     55  HB  ILE B   4     112.215  46.322  60.666  1.00-13.43           H  
ATOM     56 HG12 ILE B   4     111.958  49.127  61.820  1.00-13.43           H  
ATOM     57 HG13 ILE B   4     110.735  48.281  60.882  1.00-13.43           H  
ATOM     58 HG21 ILE B   4     113.537  46.404  62.697  1.00-13.43           H  
ATOM     59 HG22 ILE B   4     114.219  47.988  62.279  1.00-13.43           H  
ATOM     60 HG23 ILE B   4     114.652  46.543  61.338  1.00-13.43           H  
ATOM     61 HD11 ILE B   4     110.124  48.218  63.188  1.00-13.43           H  
ATOM     62 HD12 ILE B   4     111.697  47.568  63.670  1.00-13.43           H  
ATOM     63 HD13 ILE B   4     110.579  46.574  62.703  1.00-13.43           H  
ATOM     64  N   MET B   5     111.553  49.438  58.541  1.00 -4.02           N  
ATOM     65  CA  MET B   5     110.551  49.768  57.536  1.00 -4.02           C  
ATOM     66  C   MET B   5     111.194  49.982  56.172  1.00 -4.02           C  
ATOM     67  O   MET B   5     110.561  49.722  55.160  1.00 -4.02           O  
ATOM     68  CB  MET B   5     109.718  50.978  57.947  1.00 -4.02           C  
ATOM     69  CG  MET B   5     108.945  50.729  59.232  1.00 -4.02           C  
ATOM     70  SD  MET B   5     107.597  51.897  59.471  1.00 -4.02           S  
ATOM     71  CE  MET B   5     106.335  51.214  58.378  1.00 -4.02           C  
ATOM     72  H   MET B   5     111.851  50.137  59.205  1.00 -4.02           H  
ATOM     73  HA  MET B   5     109.867  48.924  57.445  1.00 -4.02           H  
ATOM     74  HB2 MET B   5     110.358  51.847  58.070  1.00 -4.02           H  
ATOM     75  HB3 MET B   5     109.008  51.177  57.147  1.00 -4.02           H  
ATOM     76  HG2 MET B   5     108.521  49.727  59.195  1.00 -4.02           H  
ATOM     77  HG3 MET B   5     109.628  50.786  60.080  1.00 -4.02           H  
ATOM     78  HE1 MET B   5     105.441  51.837  58.412  1.00 -4.02           H  
ATOM     79  HE2 MET B   5     106.079  50.205  58.698  1.00 -4.02           H  
ATOM     80  HE3 MET B   5     106.706  51.182  57.355  1.00 -4.02           H  
ATOM     81  N   THR B   6     112.466  50.356  56.112  1.00 -1.06           N  
ATOM     82  CA  THR B   6     113.136  50.508  54.820  1.00 -1.06           C  
ATOM     83  C   THR B   6     113.196  49.175  54.093  1.00 -1.06           C  
ATOM     84  O   THR B   6     112.955  49.120  52.891  1.00 -1.06           O  
ATOM     85  CB  THR B   6     114.590  51.016  54.952  1.00 -1.06           C  
ATOM     86  CG2 THR B   6     115.195  51.383  53.606  1.00 -1.06           C  
ATOM     87  OG1 THR B   6     114.621  52.181  55.775  1.00 -1.06           O  
ATOM     88  H   THR B   6     112.991  50.546  56.952  1.00 -1.06           H  
ATOM     89  HA  THR B   6     112.568  51.215  54.214  1.00 -1.06           H  
ATOM     90  HB  THR B   6     115.198  50.244  55.422  1.00 -1.06           H  
ATOM     91  HG1 THR B   6     114.462  52.958  55.214  1.00 -1.06           H  
ATOM     92 HG21 THR B   6     116.112  51.950  53.759  1.00 -1.06           H  
ATOM     93 HG22 THR B   6     114.500  52.001  53.034  1.00 -1.06           H  
ATOM     94 HG23 THR B   6     115.426  50.483  53.037  1.00 -1.06           H  
ATOM     95  N   THR B   7     113.470  48.080  54.792  1.00 23.26           N  
ATOM     96  CA  THR B   7     113.506  46.790  54.097  1.00 23.26           C  
ATOM     97  C   THR B   7     112.100  46.382  53.676  1.00 23.26           C  
ATOM     98  O   THR B   7     111.913  45.861  52.579  1.00 23.26           O  
ATOM     99  CB  THR B   7     114.236  45.664  54.877  1.00 23.26           C  
ATOM    100  CG2 THR B   7     113.647  45.353  56.233  1.00 23.26           C  
ATOM    101  OG1 THR B   7     114.234  44.456  54.115  1.00 23.26           O  
ATOM    102  H   THR B   7     113.646  48.131  55.788  1.00 23.26           H  
ATOM    103  HA  THR B   7     114.069  46.931  53.174  1.00 23.26           H  
ATOM    104  HB  THR B   7     115.263  45.975  55.020  1.00 23.26           H  
ATOM    105  HG1 THR B   7     114.760  43.802  54.599  1.00 23.26           H  
ATOM    106 HG21 THR B   7     114.169  44.501  56.664  1.00 23.26           H  
ATOM    107 HG22 THR B   7     112.589  45.104  56.145  1.00 23.26           H  
ATOM    108 HG23 THR B   7     113.777  46.203  56.899  1.00 23.26           H  
ATOM    109  N   ARG B   8     111.085  46.721  54.461  1.00  6.14           N  
ATOM    110  CA  ARG B   8     109.709  46.428  54.056  1.00  6.14           C  
ATOM    111  C   ARG B   8     109.341  47.208  52.804  1.00  6.14           C  
ATOM    112  O   ARG B   8     108.807  46.628  51.860  1.00  6.14           O  
ATOM    113  CB  ARG B   8     108.719  46.742  55.181  1.00  6.14           C  
ATOM    114  CG  ARG B   8     108.832  45.829  56.402  1.00  6.14           C  
ATOM    115  CD  ARG B   8     108.248  44.445  56.138  1.00  6.14           C  
ATOM    116  NE  ARG B   8     106.783  44.429  56.239  1.00  6.14           N  
ATOM    117  CZ  ARG B   8     105.953  43.544  55.707  1.00  6.14           C  
ATOM    118  NH1 ARG B   8     104.690  43.670  55.977  1.00  6.14           N1+
ATOM    119  NH2 ARG B   8     106.326  42.560  54.934  1.00  6.14           N  
ATOM    120  H   ARG B   8     111.257  47.190  55.343  1.00  6.14           H  
ATOM    121  HA  ARG B   8     109.639  45.372  53.799  1.00  6.14           H  
ATOM    122  HB2 ARG B   8     108.867  47.772  55.499  1.00  6.14           H  
ATOM    123  HB3 ARG B   8     107.715  46.655  54.772  1.00  6.14           H  
ATOM    124  HG2 ARG B   8     109.882  45.723  56.670  1.00  6.14           H  
ATOM    125  HG3 ARG B   8     108.303  46.279  57.243  1.00  6.14           H  
ATOM    126  HD2 ARG B   8     108.559  44.099  55.154  1.00  6.14           H  
ATOM    127  HD3 ARG B   8     108.642  43.759  56.884  1.00  6.14           H  
ATOM    128  HE  ARG B   8     106.352  45.159  56.793  1.00  6.14           H  
ATOM    129 HH11 ARG B   8     104.388  44.396  56.616  1.00  6.14           H  
ATOM    130 HH12 ARG B   8     104.010  43.075  55.543  1.00  6.14           H  
ATOM    131 HH21 ARG B   8     107.301  42.439  54.728  1.00  6.14           H  
ATOM    132 HH22 ARG B   8     105.634  41.937  54.533  1.00  6.14           H  
ATOM    133  N   PHE B   9     109.675  48.487  52.750  1.00  0.09           N  
ATOM    134  CA  PHE B   9     109.394  49.282  51.560  1.00  0.09           C  
ATOM    135  C   PHE B   9     110.253  48.874  50.372  1.00  0.09           C  
ATOM    136  O   PHE B   9     109.794  48.931  49.243  1.00  0.09           O  
ATOM    137  CB  PHE B   9     109.568  50.778  51.836  1.00  0.09           C  
ATOM    138  CG  PHE B   9     108.628  51.314  52.884  1.00  0.09           C  
ATOM    139  CD1 PHE B   9     107.255  50.999  52.851  1.00  0.09           C  
ATOM    140  CD2 PHE B   9     109.110  52.151  53.908  1.00  0.09           C  
ATOM    141  CE1 PHE B   9     106.378  51.486  53.842  1.00  0.09           C  
ATOM    142  CE2 PHE B   9     108.235  52.652  54.904  1.00  0.09           C  
ATOM    143  CZ  PHE B   9     106.866  52.307  54.872  1.00  0.09           C  
ATOM    144  H   PHE B   9     110.104  48.937  53.556  1.00  0.09           H  
ATOM    145  HA  PHE B   9     108.358  49.108  51.279  1.00  0.09           H  
ATOM    146  HB2 PHE B   9     110.595  50.967  52.149  1.00  0.09           H  
ATOM    147  HB3 PHE B   9     109.386  51.320  50.907  1.00  0.09           H  
ATOM    148  HD1 PHE B   9     106.851  50.384  52.060  1.00  0.09           H  
ATOM    149  HD2 PHE B   9     110.157  52.417  53.940  1.00  0.09           H  
ATOM    150  HE1 PHE B   9     105.331  51.235  53.802  1.00  0.09           H  
ATOM    151  HE2 PHE B   9     108.614  53.295  55.684  1.00  0.09           H  
ATOM    152  HZ  PHE B   9     106.191  52.680  55.628  1.00  0.09           H  
ATOM    153  N   SER B  10     111.468  48.401  50.596  1.00-17.34           N  
ATOM    154  CA  SER B  10     112.302  47.914  49.498  1.00-17.34           C  
ATOM    155  C   SER B  10     111.731  46.639  48.886  1.00-17.34           C  
ATOM    156  O   SER B  10     111.754  46.455  47.666  1.00-17.34           O  
ATOM    157  CB  SER B  10     113.719  47.642  49.997  1.00-17.34           C  
ATOM    158  OG  SER B  10     114.314  48.845  50.457  1.00-17.34           O  
ATOM    159  H   SER B  10     111.842  48.404  51.540  1.00-17.34           H  
ATOM    160  HA  SER B  10     112.341  48.679  48.721  1.00-17.34           H  
ATOM    161  HB2 SER B  10     113.683  46.921  50.811  1.00-17.34           H  
ATOM    162  HB3 SER B  10     114.316  47.234  49.181  1.00-17.34           H  
ATOM    163  HG  SER B  10     113.908  49.080  51.309  1.00-17.34           H  
ATOM    164  N   LEU B  11     111.200  45.759  49.722  1.00-15.03           N  
ATOM    165  CA  LEU B  11     110.539  44.545  49.244  1.00-15.03           C  
ATOM    166  C   LEU B  11     109.265  44.922  48.499  1.00-15.03           C  
ATOM    167  O   LEU B  11     108.986  44.404  47.420  1.00-15.03           O  
ATOM    168  CB  LEU B  11     110.187  43.646  50.432  1.00-15.03           C  
ATOM    169  CG  LEU B  11     111.351  42.929  51.131  1.00-15.03           C  
ATOM    170  CD1 LEU B  11     110.928  42.403  52.498  1.00-15.03           C  
ATOM    171  CD2 LEU B  11     111.865  41.781  50.282  1.00-15.03           C  
ATOM    172  H   LEU B  11     111.259  45.921  50.728  1.00-15.03           H  
ATOM    173  HA  LEU B  11     111.195  44.012  48.557  1.00-15.03           H  
ATOM    174  HB2 LEU B  11     109.683  44.263  51.171  1.00-15.03           H  
ATOM    175  HB3 LEU B  11     109.481  42.889  50.092  1.00-15.03           H  
ATOM    176  HG  LEU B  11     112.163  43.636  51.280  1.00-15.03           H  
ATOM    177 HD11 LEU B  11     111.779  41.928  52.988  1.00-15.03           H  
ATOM    178 HD12 LEU B  11     110.119  41.681  52.392  1.00-15.03           H  
ATOM    179 HD13 LEU B  11     110.596  43.233  53.121  1.00-15.03           H  
ATOM    180 HD21 LEU B  11     112.699  41.302  50.787  1.00-15.03           H  
ATOM    181 HD22 LEU B  11     112.217  42.155  49.321  1.00-15.03           H  
ATOM    182 HD23 LEU B  11     111.074  41.050  50.119  1.00-15.03           H  
ATOM    183  N   ALA B  12     108.517  45.863  49.057  1.00 -5.88           N  
ATOM    184  CA  ALA B  12     107.291  46.340  48.435  1.00 -5.88           C  
ATOM    185  C   ALA B  12     107.594  46.935  47.063  1.00 -5.88           C  
ATOM    186  O   ALA B  12     106.912  46.645  46.087  1.00 -5.88           O  
ATOM    187  CB  ALA B  12     106.636  47.391  49.331  1.00 -5.88           C  
ATOM    188  H   ALA B  12     108.789  46.254  49.954  1.00 -5.88           H  
ATOM    189  HA  ALA B  12     106.611  45.497  48.301  1.00 -5.88           H  
ATOM    190  HB1 ALA B  12     105.787  47.830  48.810  1.00 -5.88           H  
ATOM    191  HB2 ALA B  12     107.339  48.184  49.570  1.00 -5.88           H  
ATOM    192  HB3 ALA B  12     106.286  46.926  50.255  1.00 -5.88           H  
ATOM    193  N   ALA B  13     108.621  47.767  46.980  1.00-19.63           N  
ATOM    194  CA  ALA B  13     108.986  48.421  45.732  1.00-19.63           C  
ATOM    195  C   ALA B  13     109.380  47.410  44.665  1.00-19.63           C  
ATOM    196  O   ALA B  13     109.025  47.587  43.504  1.00-19.63           O  
ATOM    197  CB  ALA B  13     110.117  49.416  45.978  1.00-19.63           C  
ATOM    198  H   ALA B  13     109.152  47.989  47.819  1.00-19.63           H  
ATOM    199  HA  ALA B  13     108.117  48.960  45.362  1.00-19.63           H  
ATOM    200  HB1 ALA B  13     110.383  49.902  45.042  1.00-19.63           H  
ATOM    201  HB2 ALA B  13     110.994  48.899  46.369  1.00-19.63           H  
ATOM    202  HB3 ALA B  13     109.804  50.172  46.700  1.00-19.63           H  
ATOM    203  N   PHE B  14     110.057  46.338  45.050  1.00-24.10           N  
ATOM    204  CA  PHE B  14     110.404  45.300  44.086  1.00-24.10           C  
ATOM    205  C   PHE B  14     109.131  44.685  43.520  1.00-24.10           C  
ATOM    206  O   PHE B  14     108.968  44.595  42.308  1.00-24.10           O  
ATOM    207  CB  PHE B  14     111.256  44.202  44.724  1.00-24.10           C  
ATOM    208  CG  PHE B  14     111.574  43.086  43.772  1.00-24.10           C  
ATOM    209  CD1 PHE B  14     112.605  43.229  42.830  1.00-24.10           C  
ATOM    210  CD2 PHE B  14     110.806  41.906  43.774  1.00-24.10           C  
ATOM    211  CE1 PHE B  14     112.859  42.216  41.876  1.00-24.10           C  
ATOM    212  CE2 PHE B  14     111.042  40.884  42.823  1.00-24.10           C  
ATOM    213  CZ  PHE B  14     112.065  41.046  41.861  1.00-24.10           C  
ATOM    214  H   PHE B  14     110.338  46.234  46.019  1.00-24.10           H  
ATOM    215  HA  PHE B  14     110.957  45.749  43.260  1.00-24.10           H  
ATOM    216  HB2 PHE B  14     112.184  44.642  45.087  1.00-24.10           H  
ATOM    217  HB3 PHE B  14     110.720  43.783  45.573  1.00-24.10           H  
ATOM    218  HD1 PHE B  14     113.207  44.127  42.823  1.00-24.10           H  
ATOM    219  HD2 PHE B  14     110.016  41.780  44.500  1.00-24.10           H  
ATOM    220  HE1 PHE B  14     113.652  42.340  41.157  1.00-24.10           H  
ATOM    221  HE2 PHE B  14     110.439  39.988  42.830  1.00-24.10           H  
ATOM    222  HZ  PHE B  14     112.244  40.278  41.122  1.00-24.10           H  
ATOM    223  N   LYS B  15     108.193  44.313  44.380  1.00-25.74           N  
ATOM    224  CA  LYS B  15     106.946  43.696  43.915  1.00-25.74           C  
ATOM    225  C   LYS B  15     106.130  44.657  43.061  1.00-25.74           C  
ATOM    226  O   LYS B  15     105.605  44.286  42.018  1.00-25.74           O  
ATOM    227  CB  LYS B  15     106.117  43.242  45.115  1.00-25.74           C  
ATOM    228  CG  LYS B  15     106.807  42.180  45.952  1.00-25.74           C  
ATOM    229  CD  LYS B  15     105.981  41.820  47.166  1.00-25.74           C  
ATOM    230  CE  LYS B  15     106.771  40.890  48.065  1.00-25.74           C  
ATOM    231  NZ  LYS B  15     105.962  40.433  49.234  1.00-25.74           N1+
ATOM    232  H   LYS B  15     108.350  44.438  45.380  1.00-25.74           H  
ATOM    233  HA  LYS B  15     107.191  42.829  43.300  1.00-25.74           H  
ATOM    234  HB2 LYS B  15     105.914  44.106  45.748  1.00-25.74           H  
ATOM    235  HB3 LYS B  15     105.169  42.844  44.758  1.00-25.74           H  
ATOM    236  HG2 LYS B  15     106.972  41.291  45.345  1.00-25.74           H  
ATOM    237  HG3 LYS B  15     107.768  42.552  46.291  1.00-25.74           H  
ATOM    238  HD2 LYS B  15     105.734  42.727  47.721  1.00-25.74           H  
ATOM    239  HD3 LYS B  15     105.064  41.329  46.842  1.00-25.74           H  
ATOM    240  HE2 LYS B  15     107.087  40.020  47.487  1.00-25.74           H  
ATOM    241  HE3 LYS B  15     107.661  41.413  48.423  1.00-25.74           H  
ATOM    242  HZ1 LYS B  15     106.529  39.848  49.833  1.00-25.74           H  
ATOM    243  HZ2 LYS B  15     105.155  39.906  48.921  1.00-25.74           H  
ATOM    244  HZ3 LYS B  15     105.643  41.233  49.774  1.00-25.74           H  
ATOM    245  N   ARG B  16     106.061  45.913  43.473  1.00  4.53           N  
ATOM    246  CA  ARG B  16     105.339  46.950  42.727  1.00  4.53           C  
ATOM    247  C   ARG B  16     105.948  47.159  41.346  1.00  4.53           C  
ATOM    248  O   ARG B  16     105.226  47.333  40.365  1.00  4.53           O  
ATOM    249  CB  ARG B  16     105.385  48.255  43.530  1.00  4.53           C  
ATOM    250  CG  ARG B  16     104.482  48.264  44.765  1.00  4.53           C  
ATOM    251  CD  ARG B  16     104.898  49.333  45.771  1.00  4.53           C  
ATOM    252  NE  ARG B  16     104.779  50.698  45.236  1.00  4.53           N  
ATOM    253  CZ  ARG B  16     105.739  51.607  45.143  1.00  4.53           C  
ATOM    254  NH1 ARG B  16     105.453  52.748  44.596  1.00  4.53           N1+
ATOM    255  NH2 ARG B  16     106.961  51.441  45.571  1.00  4.53           N  
ATOM    256  H   ARG B  16     106.518  46.162  44.348  1.00  4.53           H  
ATOM    257  HA  ARG B  16     104.303  46.644  42.582  1.00  4.53           H  
ATOM    258  HB2 ARG B  16     106.414  48.418  43.845  1.00  4.53           H  
ATOM    259  HB3 ARG B  16     105.098  49.078  42.886  1.00  4.53           H  
ATOM    260  HG2 ARG B  16     103.453  48.430  44.456  1.00  4.53           H  
ATOM    261  HG3 ARG B  16     104.538  47.297  45.263  1.00  4.53           H  
ATOM    262  HD2 ARG B  16     104.268  49.243  46.657  1.00  4.53           H  
ATOM    263  HD3 ARG B  16     105.925  49.142  46.072  1.00  4.53           H  
ATOM    264  HE  ARG B  16     103.860  50.987  44.920  1.00  4.53           H  
ATOM    265 HH11 ARG B  16     104.496  52.965  44.344  1.00  4.53           H  
ATOM    266 HH12 ARG B  16     106.192  53.424  44.442  1.00  4.53           H  
ATOM    267 HH21 ARG B  16     107.218  50.602  46.058  1.00  4.53           H  
ATOM    268 HH22 ARG B  16     107.643  52.173  45.417  1.00  4.53           H  
ATOM    269  N   ASN B  17     107.267  47.126  41.254  1.00-20.08           N  
ATOM    270  CA  ASN B  17     107.939  47.284  39.966  1.00-20.08           C  
ATOM    271  C   ASN B  17     107.782  46.033  39.107  1.00-20.08           C  
ATOM    272  O   ASN B  17     107.562  46.132  37.904  1.00-20.08           O  
ATOM    273  CB  ASN B  17     109.426  47.583  40.167  1.00-20.08           C  
ATOM    274  CG  ASN B  17     109.676  48.954  40.751  1.00-20.08           C  
ATOM    275  ND2 ASN B  17     110.834  49.142  41.311  1.00-20.08           N  
ATOM    276  OD1 ASN B  17     108.837  49.851  40.681  1.00-20.08           O  
ATOM    277  H   ASN B  17     107.833  47.012  42.092  1.00-20.08           H  
ATOM    278  HA  ASN B  17     107.484  48.114  39.426  1.00-20.08           H  
ATOM    279  HB2 ASN B  17     109.864  46.829  40.822  1.00-20.08           H  
ATOM    280  HB3 ASN B  17     109.925  47.528  39.201  1.00-20.08           H  
ATOM    281 HD21 ASN B  17     111.475  48.362  41.416  1.00-20.08           H  
ATOM    282 HD22 ASN B  17     111.096  50.063  41.626  1.00-20.08           H  
ATOM    283  N   LYS B  18     107.843  44.858  39.717  1.00-29.52           N  
ATOM    284  CA  LYS B  18     107.662  43.603  38.988  1.00-29.52           C  
ATOM    285  C   LYS B  18     106.261  43.494  38.406  1.00-29.52           C  
ATOM    286  O   LYS B  18     106.109  43.188  37.234  1.00-29.52           O  
ATOM    287  CB  LYS B  18     107.956  42.418  39.913  1.00-29.52           C  
ATOM    288  CG  LYS B  18     107.917  41.067  39.219  1.00-29.52           C  
ATOM    289  CD  LYS B  18     108.214  39.938  40.190  1.00-29.52           C  
ATOM    290  CE  LYS B  18     108.110  38.591  39.490  1.00-29.52           C  
ATOM    291  NZ  LYS B  18     108.366  37.444  40.410  1.00-29.52           N1+
ATOM    292  H   LYS B  18     108.061  44.815  40.712  1.00-29.52           H  
ATOM    293  HA  LYS B  18     108.366  43.583  38.153  1.00-29.52           H  
ATOM    294  HB2 LYS B  18     108.949  42.557  40.342  1.00-29.52           H  
ATOM    295  HB3 LYS B  18     107.229  42.412  40.724  1.00-29.52           H  
ATOM    296  HG2 LYS B  18     106.930  40.914  38.790  1.00-29.52           H  
ATOM    297  HG3 LYS B  18     108.654  41.053  38.419  1.00-29.52           H  
ATOM    298  HD2 LYS B  18     109.222  40.064  40.586  1.00-29.52           H  
ATOM    299  HD3 LYS B  18     107.498  39.974  41.008  1.00-29.52           H  
ATOM    300  HE2 LYS B  18     107.110  38.491  39.068  1.00-29.52           H  
ATOM    301  HE3 LYS B  18     108.833  38.559  38.674  1.00-29.52           H  
ATOM    302  HZ1 LYS B  18     108.319  36.573  39.893  1.00-29.52           H  
ATOM    303  HZ2 LYS B  18     107.673  37.422  41.150  1.00-29.52           H  
ATOM    304  HZ3 LYS B  18     109.292  37.528  40.817  1.00-29.52           H  
ATOM    305  N   ARG B  19     105.224  43.806  39.174  1.00  2.42           N  
ATOM    306  CA  ARG B  19     103.857  43.724  38.640  1.00  2.42           C  
ATOM    307  C   ARG B  19     103.591  44.757  37.552  1.00  2.42           C  
ATOM    308  O   ARG B  19     102.808  44.497  36.647  1.00  2.42           O  
ATOM    309  CB  ARG B  19     102.800  43.821  39.750  1.00  2.42           C  
ATOM    310  CG  ARG B  19     102.860  42.704  40.813  1.00  2.42           C  
ATOM    311  CD  ARG B  19     102.737  41.283  40.254  1.00  2.42           C  
ATOM    312  NE  ARG B  19     101.416  40.984  39.683  1.00  2.42           N  
ATOM    313  CZ  ARG B  19     101.142  40.083  38.749  1.00  2.42           C  
ATOM    314  NH1 ARG B  19      99.894  39.879  38.453  1.00  2.42           N1+
ATOM    315  NH2 ARG B  19     102.037  39.376  38.111  1.00  2.42           N  
ATOM    316  H   ARG B  19     105.375  44.075  40.145  1.00  2.42           H  
ATOM    317  HA  ARG B  19     103.741  42.755  38.152  1.00  2.42           H  
ATOM    318  HB2 ARG B  19     102.906  44.784  40.249  1.00  2.42           H  
ATOM    319  HB3 ARG B  19     101.816  43.791  39.282  1.00  2.42           H  
ATOM    320  HG2 ARG B  19     103.811  42.767  41.332  1.00  2.42           H  
ATOM    321  HG3 ARG B  19     102.067  42.866  41.543  1.00  2.42           H  
ATOM    322  HD2 ARG B  19     103.508  41.125  39.502  1.00  2.42           H  
ATOM    323  HD3 ARG B  19     102.915  40.585  41.070  1.00  2.42           H  
ATOM    324  HE  ARG B  19     100.626  41.499  40.053  1.00  2.42           H  
ATOM    325 HH11 ARG B  19      99.178  40.381  38.967  1.00  2.42           H  
ATOM    326 HH12 ARG B  19      99.641  39.237  37.717  1.00  2.42           H  
ATOM    327 HH21 ARG B  19     103.027  39.515  38.296  1.00  2.42           H  
ATOM    328 HH22 ARG B  19     101.753  38.712  37.405  1.00  2.42           H  
ATOM    329  N   LYS B  20     104.305  45.875  37.573  1.00 17.49           N  
ATOM    330  CA  LYS B  20     104.272  46.827  36.457  1.00 17.49           C  
ATOM    331  C   LYS B  20     104.848  46.226  35.169  1.00 17.49           C  
ATOM    332  O   LYS B  20     104.403  46.566  34.085  1.00 17.49           O  
ATOM    333  CB  LYS B  20     105.014  48.116  36.854  1.00 17.49           C  
ATOM    334  CG  LYS B  20     105.802  48.806  35.736  1.00 17.49           C  
ATOM    335  CD  LYS B  20     106.422  50.112  36.182  1.00 17.49           C  
ATOM    336  CE  LYS B  20     107.108  50.827  35.016  1.00 17.49           C  
ATOM    337  NZ  LYS B  20     108.230  50.026  34.419  1.00 17.49           N1+
ATOM    338  H   LYS B  20     104.911  46.063  38.360  1.00 17.49           H  
ATOM    339  HA  LYS B  20     103.232  47.079  36.242  1.00 17.49           H  
ATOM    340  HB2 LYS B  20     104.279  48.815  37.253  1.00 17.49           H  
ATOM    341  HB3 LYS B  20     105.710  47.881  37.655  1.00 17.49           H  
ATOM    342  HG2 LYS B  20     106.594  48.139  35.398  1.00 17.49           H  
ATOM    343  HG3 LYS B  20     105.133  49.010  34.902  1.00 17.49           H  
ATOM    344  HD2 LYS B  20     105.639  50.756  36.579  1.00 17.49           H  
ATOM    345  HD3 LYS B  20     107.153  49.915  36.966  1.00 17.49           H  
ATOM    346  HE2 LYS B  20     106.367  51.043  34.243  1.00 17.49           H  
ATOM    347  HE3 LYS B  20     107.511  51.774  35.380  1.00 17.49           H  
ATOM    348  HZ1 LYS B  20     108.739  50.589  33.744  1.00 17.49           H  
ATOM    349  HZ2 LYS B  20     107.869  49.208  33.952  1.00 17.49           H  
ATOM    350  HZ3 LYS B  20     108.870  49.730  35.151  1.00 17.49           H  
ATOM    351  N   LEU B  21     105.849  45.362  35.267  1.00-14.89           N  
ATOM    352  CA  LEU B  21     106.480  44.781  34.076  1.00-14.89           C  
ATOM    353  C   LEU B  21     105.824  43.487  33.605  1.00-14.89           C  
ATOM    354  O   LEU B  21     105.914  43.129  32.431  1.00-14.89           O  
ATOM    355  CB  LEU B  21     107.960  44.504  34.354  1.00-14.89           C  
ATOM    356  CG  LEU B  21     108.848  45.730  34.610  1.00-14.89           C  
ATOM    357  CD1 LEU B  21     110.237  45.289  35.039  1.00-14.89           C  
ATOM    358  CD2 LEU B  21     108.965  46.622  33.373  1.00-14.89           C  
ATOM    359  H   LEU B  21     106.207  45.105  36.178  1.00-14.89           H  
ATOM    360  HA  LEU B  21     106.409  45.489  33.252  1.00-14.89           H  
ATOM    361  HB2 LEU B  21     108.025  43.840  35.217  1.00-14.89           H  
ATOM    362  HB3 LEU B  21     108.368  43.973  33.495  1.00-14.89           H  
ATOM    363  HG  LEU B  21     108.416  46.319  35.415  1.00-14.89           H  
ATOM    364 HD11 LEU B  21     110.865  46.158  35.232  1.00-14.89           H  
ATOM    365 HD12 LEU B  21     110.702  44.681  34.260  1.00-14.89           H  
ATOM    366 HD13 LEU B  21     110.165  44.702  35.955  1.00-14.89           H  
ATOM    367 HD21 LEU B  21     109.644  47.449  33.579  1.00-14.89           H  
ATOM    368 HD22 LEU B  21     107.990  47.021  33.103  1.00-14.89           H  
ATOM    369 HD23 LEU B  21     109.361  46.044  32.536  1.00-14.89           H  
ATOM    370  N   GLU B  22     105.154  42.786  34.505  1.00  8.86           N  
ATOM    371  CA  GLU B  22     104.447  41.541  34.191  1.00  8.86           C  
ATOM    372  C   GLU B  22     103.076  41.761  33.537  1.00  8.86           C  
ATOM    373  O   GLU B  22     102.037  41.285  34.013  1.00  8.86           O  
ATOM    374  CB  GLU B  22     104.322  40.682  35.454  1.00  8.86           C  
ATOM    375  CG  GLU B  22     105.647  40.113  35.905  1.00  8.86           C  
ATOM    376  CD  GLU B  22     105.495  39.106  37.024  1.00  8.86           C  
ATOM    377  OE1 GLU B  22     104.914  39.406  38.091  1.00  8.86           O  
ATOM    378  OE2 GLU B  22     105.982  37.965  36.844  1.00  8.86           O1-
ATOM    379  H   GLU B  22     105.150  43.107  35.468  1.00  8.86           H  
ATOM    380  HA  GLU B  22     105.047  40.979  33.475  1.00  8.86           H  
ATOM    381  HB2 GLU B  22     103.891  41.279  36.256  1.00  8.86           H  
ATOM    382  HB3 GLU B  22     103.665  39.839  35.246  1.00  8.86           H  
ATOM    383  HG2 GLU B  22     106.108  39.612  35.054  1.00  8.86           H  
ATOM    384  HG3 GLU B  22     106.306  40.912  36.229  1.00  8.86           H  
ATOM    385  N   LEU B  23     103.087  42.462  32.415  1.00 56.09           N  
ATOM    386  CA  LEU B  23     101.901  42.743  31.608  1.00 56.09           C  
ATOM    387  C   LEU B  23     102.100  42.324  30.153  1.00 56.09           C  
ATOM    388  O   LEU B  23     103.236  42.132  29.704  1.00 56.09           O  
ATOM    389  CB  LEU B  23     101.554  44.241  31.690  1.00 56.09           C  
ATOM    390  CG  LEU B  23     102.524  45.403  31.371  1.00 56.09           C  
ATOM    391  CD1 LEU B  23     103.684  45.191  30.399  1.00 56.09           C  
ATOM    392  CD2 LEU B  23     101.732  46.595  30.848  1.00 56.09           C  
ATOM    393  H   LEU B  23     103.975  42.810  32.075  1.00 56.09           H  
ATOM    394  HA  LEU B  23     101.058  42.174  31.993  1.00 56.09           H  
ATOM    395  HB2 LEU B  23     100.682  44.381  31.063  1.00 56.09           H  
ATOM    396  HB3 LEU B  23     101.219  44.413  32.713  1.00 56.09           H  
ATOM    397  HG  LEU B  23     102.960  45.697  32.316  1.00 56.09           H  
ATOM    398 HD11 LEU B  23     104.252  46.117  30.299  1.00 56.09           H  
ATOM    399 HD12 LEU B  23     103.289  44.890  29.430  1.00 56.09           H  
ATOM    400 HD13 LEU B  23     104.345  44.418  30.781  1.00 56.09           H  
ATOM    401 HD21 LEU B  23     102.338  47.498  30.911  1.00 56.09           H  
ATOM    402 HD22 LEU B  23     100.836  46.734  31.449  1.00 56.09           H  
ATOM    403 HD23 LEU B  23     101.433  46.441  29.813  1.00 56.09           H  
ATOM    404  N   ALA B  24     101.012  42.224  29.401  1.00 13.04           N  
ATOM    405  CA  ALA B  24     101.087  42.249  27.946  1.00 13.04           C  
ATOM    406  C   ALA B  24     101.275  43.735  27.628  1.00 13.04           C  
ATOM    407  O   ALA B  24     100.777  44.571  28.366  1.00 13.04           O  
ATOM    408  CB  ALA B  24      99.802  41.697  27.319  1.00 13.04           C  
ATOM    409  H   ALA B  24     100.101  42.244  29.841  1.00 13.04           H  
ATOM    410  HA  ALA B  24     101.948  41.680  27.601  1.00 13.04           H  
ATOM    411  HB1 ALA B  24      99.701  40.641  27.563  1.00 13.04           H  
ATOM    412  HB2 ALA B  24      99.847  41.803  26.234  1.00 13.04           H  
ATOM    413  HB3 ALA B  24      98.936  42.237  27.696  1.00 13.04           H  
ATOM    414  N   GLU B  25     101.979  44.086  26.561  1.00  8.79           N  
ATOM    415  CA  GLU B  25     102.391  45.478  26.332  1.00  8.79           C  
ATOM    416  C   GLU B  25     101.271  46.524  26.404  1.00  8.79           C  
ATOM    417  O   GLU B  25     101.435  47.585  27.003  1.00  8.79           O  
ATOM    418  CB  GLU B  25     103.057  45.590  24.954  1.00  8.79           C  
ATOM    419  CG  GLU B  25     103.752  46.923  24.702  1.00  8.79           C  
ATOM    420  CD  GLU B  25     103.942  47.204  23.228  1.00  8.79           C  
ATOM    421  OE1 GLU B  25     104.526  46.374  22.492  1.00  8.79           O  
ATOM    422  OE2 GLU B  25     103.526  48.294  22.781  1.00  8.79           O1-
ATOM    423  H   GLU B  25     102.294  43.365  25.919  1.00  8.79           H  
ATOM    424  HA  GLU B  25     103.116  45.739  27.102  1.00  8.79           H  
ATOM    425  HB2 GLU B  25     103.786  44.787  24.843  1.00  8.79           H  
ATOM    426  HB3 GLU B  25     102.286  45.458  24.196  1.00  8.79           H  
ATOM    427  HG2 GLU B  25     103.148  47.729  25.110  1.00  8.79           H  
ATOM    428  HG3 GLU B  25     104.715  46.927  25.212  1.00  8.79           H  
ATOM    429  N   ARG B  26     100.123  46.237  25.806  1.00  5.90           N  
ATOM    430  CA  ARG B  26      99.039  47.225  25.691  1.00  5.90           C  
ATOM    431  C   ARG B  26      98.141  47.367  26.920  1.00  5.90           C  
ATOM    432  O   ARG B  26      97.069  47.974  26.842  1.00  5.90           O  
ATOM    433  CB  ARG B  26      98.195  46.888  24.454  1.00  5.90           C  
ATOM    434  CG  ARG B  26      98.960  46.925  23.125  1.00  5.90           C  
ATOM    435  CD  ARG B  26      99.430  48.318  22.733  1.00  5.90           C  
ATOM    436  NE  ARG B  26      98.302  49.216  22.451  1.00  5.90           N  
ATOM    437  CZ  ARG B  26      98.366  50.520  22.230  1.00  5.90           C  
ATOM    438  NH1 ARG B  26      97.283  51.128  21.844  1.00  5.90           N1+
ATOM    439  NH2 ARG B  26      99.451  51.226  22.391  1.00  5.90           N  
ATOM    440  H   ARG B  26     100.015  45.325  25.367  1.00  5.90           H  
ATOM    441  HA  ARG B  26      99.493  48.204  25.538  1.00  5.90           H  
ATOM    442  HB2 ARG B  26      97.782  45.888  24.585  1.00  5.90           H  
ATOM    443  HB3 ARG B  26      97.365  47.589  24.387  1.00  5.90           H  
ATOM    444  HG2 ARG B  26      99.829  46.273  23.187  1.00  5.90           H  
ATOM    445  HG3 ARG B  26      98.308  46.549  22.341  1.00  5.90           H  
ATOM    446  HD2 ARG B  26     100.039  48.731  23.535  1.00  5.90           H  
ATOM    447  HD3 ARG B  26     100.047  48.239  21.838  1.00  5.90           H  
ATOM    448  HE  ARG B  26      97.378  48.796  22.406  1.00  5.90           H  
ATOM    449 HH11 ARG B  26      96.426  50.607  21.743  1.00  5.90           H  
ATOM    450 HH12 ARG B  26      97.298  52.118  21.632  1.00  5.90           H  
ATOM    451 HH21 ARG B  26     100.302  50.774  22.704  1.00  5.90           H  
ATOM    452 HH22 ARG B  26      99.438  52.228  22.231  1.00  5.90           H  
ATOM    453  N   VAL B  27      98.538  46.810  28.051  1.00 38.67           N  
ATOM    454  CA  VAL B  27      97.756  46.857  29.298  1.00 38.67           C  
ATOM    455  C   VAL B  27      98.157  48.148  30.049  1.00 38.67           C  
ATOM    456  O   VAL B  27      98.768  48.151  31.110  1.00 38.67           O  
ATOM    457  CB  VAL B  27      97.973  45.489  30.029  1.00 38.67           C  
ATOM    458  CG1 VAL B  27      97.252  45.356  31.351  1.00 38.67           C  
ATOM    459  CG2 VAL B  27      97.496  44.341  29.116  1.00 38.67           C  
ATOM    460  H   VAL B  27      99.433  46.329  28.076  1.00 38.67           H  
ATOM    461  HA  VAL B  27      96.697  46.937  29.051  1.00 38.67           H  
ATOM    462  HB  VAL B  27      99.032  45.364  30.209  1.00 38.67           H  
ATOM    463 HG11 VAL B  27      97.373  44.344  31.732  1.00 38.67           H  
ATOM    464 HG12 VAL B  27      96.190  45.575  31.232  1.00 38.67           H  
ATOM    465 HG13 VAL B  27      97.698  46.040  32.071  1.00 38.67           H  
ATOM    466 HG21 VAL B  27      97.651  43.387  29.617  1.00 38.67           H  
ATOM    467 HG22 VAL B  27      98.065  44.326  28.188  1.00 38.67           H  
ATOM    468 HG23 VAL B  27      96.436  44.460  28.886  1.00 38.67           H  
ATOM    469  N   ASP B  28      97.900  49.271  29.392  1.00 36.17           N  
ATOM    470  CA  ASP B  28      98.554  50.553  29.698  1.00 36.17           C  
ATOM    471  C   ASP B  28      98.308  51.245  31.049  1.00 36.17           C  
ATOM    472  O   ASP B  28      99.186  51.241  31.899  1.00 36.17           O  
ATOM    473  CB  ASP B  28      98.361  51.541  28.530  1.00 36.17           C  
ATOM    474  CG  ASP B  28      96.918  52.025  28.340  1.00 36.17           C  
ATOM    475  OD1 ASP B  28      95.936  51.399  28.806  1.00 36.17           O  
ATOM    476  OD2 ASP B  28      96.754  53.075  27.683  1.00 36.17           O1-
ATOM    477  H   ASP B  28      97.298  49.230  28.580  1.00 36.17           H  
ATOM    478  HA  ASP B  28      99.618  50.324  29.714  1.00 36.17           H  
ATOM    479  HB2 ASP B  28      98.997  52.410  28.703  1.00 36.17           H  
ATOM    480  HB3 ASP B  28      98.690  51.060  27.609  1.00 36.17           H  
ATOM    481  N   THR B  29      97.141  51.812  31.325  1.00-11.80           N  
ATOM    482  CA  THR B  29      96.926  52.473  32.621  1.00-11.80           C  
ATOM    483  C   THR B  29      96.812  51.395  33.680  1.00-11.80           C  
ATOM    484  O   THR B  29      97.046  51.598  34.871  1.00-11.80           O  
ATOM    485  CB  THR B  29      95.637  53.315  32.643  1.00-11.80           C  
ATOM    486  CG2 THR B  29      95.770  54.536  31.776  1.00-11.80           C  
ATOM    487  OG1 THR B  29      94.552  52.549  32.115  1.00-11.80           O  
ATOM    488  H   THR B  29      96.393  51.792  30.637  1.00-11.80           H  
ATOM    489  HA  THR B  29      97.778  53.108  32.867  1.00-11.80           H  
ATOM    490  HB  THR B  29      95.420  53.623  33.667  1.00-11.80           H  
ATOM    491  HG1 THR B  29      94.366  52.881  31.223  1.00-11.80           H  
ATOM    492 HG21 THR B  29      94.854  55.119  31.840  1.00-11.80           H  
ATOM    493 HG22 THR B  29      95.948  54.254  30.739  1.00-11.80           H  
ATOM    494 HG23 THR B  29      96.599  55.145  32.134  1.00-11.80           H  
ATOM    495  N   ASP B  30      96.506  50.204  33.204  1.00  5.85           N  
ATOM    496  CA  ASP B  30      96.385  49.039  34.047  1.00  5.85           C  
ATOM    497  C   ASP B  30      97.717  48.642  34.679  1.00  5.85           C  
ATOM    498  O   ASP B  30      97.684  48.114  35.782  1.00  5.85           O  
ATOM    499  CB  ASP B  30      95.835  47.874  33.240  1.00  5.85           C  
ATOM    500  CG  ASP B  30      94.332  47.927  33.059  1.00  5.85           C  
ATOM    501  OD1 ASP B  30      93.726  49.001  32.892  1.00  5.85           O  
ATOM    502  OD2 ASP B  30      93.722  46.838  33.058  1.00  5.85           O1-
ATOM    503  H   ASP B  30      96.342  50.101  32.214  1.00  5.85           H  
ATOM    504  HA  ASP B  30      95.685  49.255  34.854  1.00  5.85           H  
ATOM    505  HB2 ASP B  30      96.312  47.869  32.264  1.00  5.85           H  
ATOM    506  HB3 ASP B  30      96.079  46.950  33.764  1.00  5.85           H  
ATOM    507  N   PHE B  31      98.879  48.905  34.086  1.00 21.56           N  
ATOM    508  CA  PHE B  31     100.129  48.576  34.792  1.00 21.56           C  
ATOM    509  C   PHE B  31     100.311  49.481  36.000  1.00 21.56           C  
ATOM    510  O   PHE B  31     100.843  49.068  37.034  1.00 21.56           O  
ATOM    511  CB  PHE B  31     101.390  48.586  33.904  1.00 21.56           C  
ATOM    512  CG  PHE B  31     102.070  49.934  33.740  1.00 21.56           C  
ATOM    513  CD1 PHE B  31     102.837  50.504  34.777  1.00 21.56           C  
ATOM    514  CD2 PHE B  31     101.987  50.617  32.517  1.00 21.56           C  
ATOM    515  CE1 PHE B  31     103.441  51.778  34.629  1.00 21.56           C  
ATOM    516  CE2 PHE B  31     102.587  51.891  32.349  1.00 21.56           C  
ATOM    517  CZ  PHE B  31     103.304  52.478  33.414  1.00 21.56           C  
ATOM    518  H   PHE B  31      98.916  49.308  33.150  1.00 21.56           H  
ATOM    519  HA  PHE B  31     100.020  47.561  35.166  1.00 21.56           H  
ATOM    520  HB2 PHE B  31     102.111  47.902  34.346  1.00 21.56           H  
ATOM    521  HB3 PHE B  31     101.116  48.216  32.929  1.00 21.56           H  
ATOM    522  HD1 PHE B  31     102.950  49.975  35.711  1.00 21.56           H  
ATOM    523  HD2 PHE B  31     101.445  50.175  31.692  1.00 21.56           H  
ATOM    524  HE1 PHE B  31     103.998  52.214  35.445  1.00 21.56           H  
ATOM    525  HE2 PHE B  31     102.485  52.415  31.410  1.00 21.56           H  
ATOM    526  HZ  PHE B  31     103.740  53.460  33.296  1.00 21.56           H  
ATOM    527  N   MET B  32      99.858  50.722  35.882  1.00 -6.18           N  
ATOM    528  CA  MET B  32     100.022  51.670  36.973  1.00 -6.18           C  
ATOM    529  C   MET B  32      99.034  51.275  38.058  1.00 -6.18           C  
ATOM    530  O   MET B  32      99.362  51.271  39.241  1.00 -6.18           O  
ATOM    531  CB  MET B  32      99.813  53.107  36.493  1.00 -6.18           C  
ATOM    532  CG  MET B  32     100.108  54.142  37.567  1.00 -6.18           C  
ATOM    533  SD  MET B  32     101.789  54.039  38.243  1.00 -6.18           S  
ATOM    534  CE  MET B  32     102.756  54.727  36.903  1.00 -6.18           C  
ATOM    535  H   MET B  32      99.420  51.020  35.018  1.00 -6.18           H  
ATOM    536  HA  MET B  32     101.031  51.573  37.369  1.00 -6.18           H  
ATOM    537  HB2 MET B  32     100.472  53.282  35.643  1.00 -6.18           H  
ATOM    538  HB3 MET B  32      98.783  53.230  36.160  1.00 -6.18           H  
ATOM    539  HG2 MET B  32      99.952  55.139  37.153  1.00 -6.18           H  
ATOM    540  HG3 MET B  32      99.403  53.995  38.383  1.00 -6.18           H  
ATOM    541  HE1 MET B  32     103.811  54.694  37.158  1.00 -6.18           H  
ATOM    542  HE2 MET B  32     102.460  55.763  36.738  1.00 -6.18           H  
ATOM    543  HE3 MET B  32     102.587  54.159  35.987  1.00 -6.18           H  
ATOM    544  N   GLN B  33      97.855  50.828  37.656  1.00-14.48           N  
ATOM    545  CA  GLN B  33      96.914  50.266  38.618  1.00-14.48           C  
ATOM    546  C   GLN B  33      97.487  49.016  39.272  1.00-14.48           C  
ATOM    547  O   GLN B  33      97.388  48.894  40.473  1.00-14.48           O  
ATOM    548  CB  GLN B  33      95.579  49.920  37.964  1.00-14.48           C  
ATOM    549  CG  GLN B  33      94.795  51.128  37.516  1.00-14.48           C  
ATOM    550  CD  GLN B  33      93.575  50.751  36.720  1.00-14.48           C  
ATOM    551  NE2 GLN B  33      93.487  51.266  35.528  1.00-14.48           N  
ATOM    552  OE1 GLN B  33      92.726  49.985  37.159  1.00-14.48           O  
ATOM    553  H   GLN B  33      97.605  50.866  36.670  1.00-14.48           H  
ATOM    554  HA  GLN B  33      96.737  51.000  39.406  1.00-14.48           H  
ATOM    555  HB2 GLN B  33      95.769  49.289  37.102  1.00-14.48           H  
ATOM    556  HB3 GLN B  33      94.973  49.359  38.675  1.00-14.48           H  
ATOM    557  HG2 GLN B  33      94.492  51.705  38.390  1.00-14.48           H  
ATOM    558  HG3 GLN B  33      95.426  51.753  36.889  1.00-14.48           H  
ATOM    559 HE21 GLN B  33      94.196  51.900  35.202  1.00-14.48           H  
ATOM    560 HE22 GLN B  33      92.711  51.010  34.940  1.00-14.48           H  
ATOM    561  N   LEU B  34      98.128  48.112  38.545  1.00  2.33           N  
ATOM    562  CA  LEU B  34      98.696  46.903  39.153  1.00  2.33           C  
ATOM    563  C   LEU B  34      99.771  47.262  40.172  1.00  2.33           C  
ATOM    564  O   LEU B  34      99.820  46.682  41.261  1.00  2.33           O  
ATOM    565  CB  LEU B  34      99.294  45.987  38.076  1.00  2.33           C  
ATOM    566  CG  LEU B  34      98.305  45.180  37.220  1.00  2.33           C  
ATOM    567  CD1 LEU B  34      98.980  44.664  35.958  1.00  2.33           C  
ATOM    568  CD2 LEU B  34      97.692  44.013  37.992  1.00  2.33           C  
ATOM    569  H   LEU B  34      98.209  48.242  37.540  1.00  2.33           H  
ATOM    570  HA  LEU B  34      97.907  46.371  39.684  1.00  2.33           H  
ATOM    571  HB2 LEU B  34      99.896  46.604  37.413  1.00  2.33           H  
ATOM    572  HB3 LEU B  34      99.965  45.279  38.562  1.00  2.33           H  
ATOM    573  HG  LEU B  34      97.501  45.837  36.913  1.00  2.33           H  
ATOM    574 HD11 LEU B  34      98.291  44.031  35.403  1.00  2.33           H  
ATOM    575 HD12 LEU B  34      99.865  44.085  36.216  1.00  2.33           H  
ATOM    576 HD13 LEU B  34      99.273  45.501  35.326  1.00  2.33           H  
ATOM    577 HD21 LEU B  34      97.002  43.466  37.348  1.00  2.33           H  
ATOM    578 HD22 LEU B  34      97.136  44.383  38.853  1.00  2.33           H  
ATOM    579 HD23 LEU B  34      98.477  43.335  38.329  1.00  2.33           H  
ATOM    580  N   LYS B  35     100.589  48.258  39.861  1.00  4.95           N  
ATOM    581  CA  LYS B  35     101.572  48.773  40.816  1.00  4.95           C  
ATOM    582  C   LYS B  35     100.871  49.333  42.055  1.00  4.95           C  
ATOM    583  O   LYS B  35     101.282  49.044  43.175  1.00  4.95           O  
ATOM    584  CB  LYS B  35     102.455  49.823  40.121  1.00  4.95           C  
ATOM    585  CG  LYS B  35     103.215  50.763  41.058  1.00  4.95           C  
ATOM    586  CD  LYS B  35     104.316  51.568  40.367  1.00  4.95           C  
ATOM    587  CE  LYS B  35     105.593  50.762  40.136  1.00  4.95           C  
ATOM    588  NZ  LYS B  35     106.716  51.636  39.656  1.00  4.95           N1+
ATOM    589  H   LYS B  35     100.523  48.684  38.936  1.00  4.95           H  
ATOM    590  HA  LYS B  35     102.203  47.951  41.154  1.00  4.95           H  
ATOM    591  HB2 LYS B  35     103.160  49.293  39.482  1.00  4.95           H  
ATOM    592  HB3 LYS B  35     101.827  50.438  39.479  1.00  4.95           H  
ATOM    593  HG2 LYS B  35     102.500  51.463  41.491  1.00  4.95           H  
ATOM    594  HG3 LYS B  35     103.655  50.187  41.864  1.00  4.95           H  
ATOM    595  HD2 LYS B  35     103.944  51.960  39.419  1.00  4.95           H  
ATOM    596  HD3 LYS B  35     104.567  52.406  41.012  1.00  4.95           H  
ATOM    597  HE2 LYS B  35     105.892  50.301  41.078  1.00  4.95           H  
ATOM    598  HE3 LYS B  35     105.401  49.971  39.409  1.00  4.95           H  
ATOM    599  HZ1 LYS B  35     107.586  51.114  39.651  1.00  4.95           H  
ATOM    600  HZ2 LYS B  35     106.823  52.437  40.269  1.00  4.95           H  
ATOM    601  HZ3 LYS B  35     106.517  51.991  38.725  1.00  4.95           H  
ATOM    602  N   LYS B  36      99.795  50.086  41.883  1.00-22.85           N  
ATOM    603  CA  LYS B  36      99.065  50.678  43.013  1.00-22.85           C  
ATOM    604  C   LYS B  36      98.207  49.699  43.808  1.00-22.85           C  
ATOM    605  O   LYS B  36      98.091  49.837  45.021  1.00-22.85           O  
ATOM    606  CB  LYS B  36      98.215  51.843  42.503  1.00-22.85           C  
ATOM    607  CG  LYS B  36      99.083  53.023  42.075  1.00-22.85           C  
ATOM    608  CD  LYS B  36      98.294  54.126  41.402  1.00-22.85           C  
ATOM    609  CE  LYS B  36      99.235  55.270  41.046  1.00-22.85           C  
ATOM    610  NZ  LYS B  36      98.531  56.402  40.368  1.00-22.85           N1+
ATOM    611  H   LYS B  36      99.483  50.296  40.936  1.00-22.85           H  
ATOM    612  HA  LYS B  36      99.792  51.091  43.713  1.00-22.85           H  
ATOM    613  HB2 LYS B  36      97.614  51.501  41.661  1.00-22.85           H  
ATOM    614  HB3 LYS B  36      97.549  52.179  43.299  1.00-22.85           H  
ATOM    615  HG2 LYS B  36      99.574  53.425  42.961  1.00-22.85           H  
ATOM    616  HG3 LYS B  36      99.850  52.684  41.382  1.00-22.85           H  
ATOM    617  HD2 LYS B  36      97.828  53.736  40.496  1.00-22.85           H  
ATOM    618  HD3 LYS B  36      97.524  54.485  42.081  1.00-22.85           H  
ATOM    619  HE2 LYS B  36      99.707  55.636  41.961  1.00-22.85           H  
ATOM    620  HE3 LYS B  36     100.017  54.891  40.388  1.00-22.85           H  
ATOM    621  HZ1 LYS B  36      99.205  57.111  40.101  1.00-22.85           H  
ATOM    622  HZ2 LYS B  36      97.854  56.815  40.997  1.00-22.85           H  
ATOM    623  HZ3 LYS B  36      98.060  56.077  39.529  1.00-22.85           H  
ATOM    624  N   ARG B  37      97.665  48.661  43.186  1.00-11.76           N  
ATOM    625  CA  ARG B  37      96.956  47.609  43.929  1.00-11.76           C  
ATOM    626  C   ARG B  37      97.966  46.889  44.799  1.00-11.76           C  
ATOM    627  O   ARG B  37      97.727  46.650  45.979  1.00-11.76           O  
ATOM    628  CB  ARG B  37      96.305  46.558  43.018  1.00-11.76           C  
ATOM    629  CG  ARG B  37      95.189  47.011  42.087  1.00-11.76           C  
ATOM    630  CD  ARG B  37      94.007  47.659  42.769  1.00-11.76           C  
ATOM    631  NE  ARG B  37      92.960  47.833  41.757  1.00-11.76           N  
ATOM    632  CZ  ARG B  37      92.735  48.902  41.010  1.00-11.76           C  
ATOM    633  NH1 ARG B  37      91.894  48.777  40.031  1.00-11.76           N1+
ATOM    634  NH2 ARG B  37      93.305  50.067  41.169  1.00-11.76           N  
ATOM    635  H   ARG B  37      97.733  48.600  42.170  1.00-11.76           H  
ATOM    636  HA  ARG B  37      96.205  48.058  44.581  1.00-11.76           H  
ATOM    637  HB2 ARG B  37      97.083  46.108  42.402  1.00-11.76           H  
ATOM    638  HB3 ARG B  37      95.899  45.777  43.661  1.00-11.76           H  
ATOM    639  HG2 ARG B  37      95.577  47.709  41.362  1.00-11.76           H  
ATOM    640  HG3 ARG B  37      94.831  46.136  41.545  1.00-11.76           H  
ATOM    641  HD2 ARG B  37      93.642  46.998  43.555  1.00-11.76           H  
ATOM    642  HD3 ARG B  37      94.292  48.619  43.200  1.00-11.76           H  
ATOM    643  HE  ARG B  37      92.388  47.017  41.567  1.00-11.76           H  
ATOM    644 HH11 ARG B  37      91.478  47.874  39.846  1.00-11.76           H  
ATOM    645 HH12 ARG B  37      91.692  49.564  39.433  1.00-11.76           H  
ATOM    646 HH21 ARG B  37      93.975  50.222  41.903  1.00-11.76           H  
ATOM    647 HH22 ARG B  37      93.049  50.831  40.553  1.00-11.76           H  
ATOM    648  N   ARG B  38      99.126  46.596  44.225  1.00  7.42           N  
ATOM    649  CA  ARG B  38     100.191  45.945  44.983  1.00  7.42           C  
ATOM    650  C   ARG B  38     100.610  46.842  46.134  1.00  7.42           C  
ATOM    651  O   ARG B  38     100.740  46.366  47.249  1.00  7.42           O  
ATOM    652  CB  ARG B  38     101.379  45.596  44.074  1.00  7.42           C  
ATOM    653  CG  ARG B  38     102.512  44.842  44.759  1.00  7.42           C  
ATOM    654  CD  ARG B  38     102.106  43.448  45.213  1.00  7.42           C  
ATOM    655  NE  ARG B  38     102.473  43.236  46.619  1.00  7.42           N  
ATOM    656  CZ  ARG B  38     102.311  42.124  47.317  1.00  7.42           C  
ATOM    657  NH1 ARG B  38     102.712  42.118  48.551  1.00  7.42           N1+
ATOM    658  NH2 ARG B  38     101.801  41.023  46.833  1.00  7.42           N  
ATOM    659  H   ARG B  38      99.270  46.802  43.240  1.00  7.42           H  
ATOM    660  HA  ARG B  38      99.786  45.030  45.418  1.00  7.42           H  
ATOM    661  HB2 ARG B  38     101.011  44.987  43.248  1.00  7.42           H  
ATOM    662  HB3 ARG B  38     101.785  46.516  43.659  1.00  7.42           H  
ATOM    663  HG2 ARG B  38     103.346  44.753  44.064  1.00  7.42           H  
ATOM    664  HG3 ARG B  38     102.848  45.410  45.627  1.00  7.42           H  
ATOM    665  HD2 ARG B  38     101.031  43.315  45.097  1.00  7.42           H  
ATOM    666  HD3 ARG B  38     102.616  42.713  44.591  1.00  7.42           H  
ATOM    667  HE  ARG B  38     102.899  44.017  47.120  1.00  7.42           H  
ATOM    668 HH11 ARG B  38     103.110  42.970  48.944  1.00  7.42           H  
ATOM    669 HH12 ARG B  38     102.638  41.281  49.107  1.00  7.42           H  
ATOM    670 HH21 ARG B  38     101.464  41.001  45.881  1.00  7.42           H  
ATOM    671 HH22 ARG B  38     101.737  40.198  47.407  1.00  7.42           H  
ATOM    672  N   GLN B  39     100.749  48.134  45.884  1.00  2.31           N  
ATOM    673  CA  GLN B  39     101.124  49.093  46.921  1.00  2.31           C  
ATOM    674  C   GLN B  39     100.105  49.164  48.051  1.00  2.31           C  
ATOM    675  O   GLN B  39     100.484  49.183  49.207  1.00  2.31           O  
ATOM    676  CB  GLN B  39     101.292  50.465  46.259  1.00  2.31           C  
ATOM    677  CG  GLN B  39     101.898  51.570  47.118  1.00  2.31           C  
ATOM    678  CD  GLN B  39     102.296  52.778  46.281  1.00  2.31           C  
ATOM    679  NE2 GLN B  39     102.426  53.911  46.903  1.00  2.31           N  
ATOM    680  OE1 GLN B  39     102.557  52.666  45.078  1.00  2.31           O  
ATOM    681  H   GLN B  39     100.616  48.475  44.938  1.00  2.31           H  
ATOM    682  HA  GLN B  39     102.075  48.779  47.352  1.00  2.31           H  
ATOM    683  HB2 GLN B  39     101.931  50.315  45.393  1.00  2.31           H  
ATOM    684  HB3 GLN B  39     100.324  50.811  45.906  1.00  2.31           H  
ATOM    685  HG2 GLN B  39     101.180  51.873  47.880  1.00  2.31           H  
ATOM    686  HG3 GLN B  39     102.789  51.186  47.613  1.00  2.31           H  
ATOM    687 HE21 GLN B  39     102.179  53.987  47.886  1.00  2.31           H  
ATOM    688 HE22 GLN B  39     102.731  54.725  46.402  1.00  2.31           H  
ATOM    689  N   SER B  40      98.824  49.138  47.717  1.00 -9.46           N  
ATOM    690  CA  SER B  40      97.750  49.190  48.712  1.00 -9.46           C  
ATOM    691  C   SER B  40      97.702  47.946  49.595  1.00 -9.46           C  
ATOM    692  O   SER B  40      97.287  47.994  50.753  1.00 -9.46           O  
ATOM    693  CB  SER B  40      96.409  49.335  47.992  1.00 -9.46           C  
ATOM    694  OG  SER B  40      96.389  50.512  47.193  1.00 -9.46           O  
ATOM    695  H   SER B  40      98.567  49.107  46.737  1.00 -9.46           H  
ATOM    696  HA  SER B  40      97.906  50.054  49.357  1.00 -9.46           H  
ATOM    697  HB2 SER B  40      96.246  48.465  47.355  1.00 -9.46           H  
ATOM    698  HB3 SER B  40      95.608  49.383  48.728  1.00 -9.46           H  
ATOM    699  HG  SER B  40      97.026  50.406  46.468  1.00 -9.46           H  
ATOM    700  N   SER B  41      98.145  46.823  49.045  1.00-12.78           N  
ATOM    701  CA  SER B  41      98.162  45.566  49.787  1.00-12.78           C  
ATOM    702  C   SER B  41      99.361  45.444  50.724  1.00-12.78           C  
ATOM    703  O   SER B  41      99.477  44.472  51.471  1.00-12.78           O  
ATOM    704  CB  SER B  41      98.108  44.373  48.830  1.00-12.78           C  
ATOM    705  OG  SER B  41      99.264  44.237  48.013  1.00-12.78           O  
ATOM    706  H   SER B  41      98.460  46.831  48.083  1.00-12.78           H  
ATOM    707  HA  SER B  41      97.265  45.531  50.405  1.00-12.78           H  
ATOM    708  HB2 SER B  41      97.988  43.462  49.413  1.00-12.78           H  
ATOM    709  HB3 SER B  41      97.236  44.487  48.185  1.00-12.78           H  
ATOM    710  HG  SER B  41      99.725  45.092  47.953  1.00-12.78           H  
ATOM    711  N   GLU B  42     100.252  46.423  50.720  1.00 16.17           N  
ATOM    712  CA  GLU B  42     101.352  46.447  51.679  1.00 16.17           C  
ATOM    713  C   GLU B  42     100.839  47.186  52.906  1.00 16.17           C  
ATOM    714  O   GLU B  42     100.532  48.370  52.826  1.00 16.17           O  
ATOM    715  CB  GLU B  42     102.577  47.170  51.108  1.00 16.17           C  
ATOM    716  CG  GLU B  42     103.058  46.670  49.748  1.00 16.17           C  
ATOM    717  CD  GLU B  42     103.589  45.238  49.715  1.00 16.17           C  
ATOM    718  OE1 GLU B  42     103.668  44.539  50.756  1.00 16.17           O  
ATOM    719  OE2 GLU B  42     103.911  44.766  48.602  1.00 16.17           O1-
ATOM    720  H   GLU B  42     100.149  47.218  50.096  1.00 16.17           H  
ATOM    721  HA  GLU B  42     101.628  45.431  51.951  1.00 16.17           H  
ATOM    722  HB2 GLU B  42     102.326  48.221  50.986  1.00 16.17           H  
ATOM    723  HB3 GLU B  42     103.392  47.105  51.826  1.00 16.17           H  
ATOM    724  HG2 GLU B  42     102.243  46.750  49.047  1.00 16.17           H  
ATOM    725  HG3 GLU B  42     103.833  47.342  49.402  1.00 16.17           H  
ATOM    726  N   LYS B  43     100.724  46.513  54.043  1.00 -3.26           N  
ATOM    727  CA  LYS B  43     100.131  47.140  55.231  1.00 -3.26           C  
ATOM    728  C   LYS B  43     100.999  48.250  55.800  1.00 -3.26           C  
ATOM    729  O   LYS B  43     100.561  49.058  56.607  1.00 -3.26           O  
ATOM    730  CB  LYS B  43      99.875  46.100  56.328  1.00 -3.26           C  
ATOM    731  CG  LYS B  43      98.862  45.032  55.941  1.00 -3.26           C  
ATOM    732  CD  LYS B  43      98.511  44.158  57.127  1.00 -3.26           C  
ATOM    733  CE  LYS B  43      97.458  43.140  56.748  1.00 -3.26           C  
ATOM    734  NZ  LYS B  43      97.135  42.228  57.889  1.00 -3.26           N1+
ATOM    735  H   LYS B  43     101.028  45.540  54.095  1.00 -3.26           H  
ATOM    736  HA  LYS B  43      99.181  47.596  54.951  1.00 -3.26           H  
ATOM    737  HB2 LYS B  43     100.816  45.622  56.599  1.00 -3.26           H  
ATOM    738  HB3 LYS B  43      99.492  46.625  57.203  1.00 -3.26           H  
ATOM    739  HG2 LYS B  43      97.956  45.515  55.589  1.00 -3.26           H  
ATOM    740  HG3 LYS B  43      99.260  44.412  55.139  1.00 -3.26           H  
ATOM    741  HD2 LYS B  43      99.405  43.642  57.469  1.00 -3.26           H  
ATOM    742  HD3 LYS B  43      98.127  44.783  57.933  1.00 -3.26           H  
ATOM    743  HE2 LYS B  43      96.554  43.663  56.434  1.00 -3.26           H  
ATOM    744  HE3 LYS B  43      97.823  42.544  55.910  1.00 -3.26           H  
ATOM    745  HZ1 LYS B  43      96.362  41.620  57.630  1.00 -3.26           H  
ATOM    746  HZ2 LYS B  43      96.870  42.764  58.709  1.00 -3.26           H  
ATOM    747  HZ3 LYS B  43      97.943  41.663  58.112  1.00 -3.26           H  
ATOM    748  N   GLU B  44     102.252  48.271  55.381  1.00 11.56           N  
ATOM    749  CA  GLU B  44     103.215  49.254  55.861  1.00 11.56           C  
ATOM    750  C   GLU B  44     103.073  50.611  55.186  1.00 11.56           C  
ATOM    751  O   GLU B  44     103.510  51.629  55.720  1.00 11.56           O  
ATOM    752  CB  GLU B  44     104.630  48.750  55.587  1.00 11.56           C  
ATOM    753  CG  GLU B  44     104.901  47.331  56.051  1.00 11.56           C  
ATOM    754  CD  GLU B  44     104.821  47.110  57.551  1.00 11.56           C  
ATOM    755  OE1 GLU B  44     104.714  48.047  58.368  1.00 11.56           O  
ATOM    756  OE2 GLU B  44     104.925  45.926  57.938  1.00 11.56           O1-
ATOM    757  H   GLU B  44     102.556  47.574  54.719  1.00 11.56           H  
ATOM    758  HA  GLU B  44     103.086  49.382  56.935  1.00 11.56           H  
ATOM    759  HB2 GLU B  44     104.795  48.776  54.509  1.00 11.56           H  
ATOM    760  HB3 GLU B  44     105.345  49.426  56.053  1.00 11.56           H  
ATOM    761  HG2 GLU B  44     104.209  46.647  55.561  1.00 11.56           H  
ATOM    762  HG3 GLU B  44     105.898  47.065  55.727  1.00 11.56           H  
ATOM    763  N   ASN B  45     102.493  50.619  53.996  1.00 27.71           N  
ATOM    764  CA  ASN B  45     102.377  51.840  53.205  1.00 27.71           C  
ATOM    765  C   ASN B  45     101.079  52.545  53.581  1.00 27.71           C  
ATOM    766  O   ASN B  45     100.139  51.934  54.090  1.00 27.71           O  
ATOM    767  CB  ASN B  45     102.428  51.511  51.707  1.00 27.71           C  
ATOM    768  CG  ASN B  45     103.832  51.259  51.220  1.00 27.71           C  
ATOM    769  ND2 ASN B  45     104.548  52.316  50.959  1.00 27.71           N  
ATOM    770  OD1 ASN B  45     104.285  50.131  51.095  1.00 27.71           O  
ATOM    771  H   ASN B  45     102.060  49.774  53.640  1.00 27.71           H  
ATOM    772  HA  ASN B  45     103.201  52.513  53.447  1.00 27.71           H  
ATOM    773  HB2 ASN B  45     101.817  50.632  51.511  1.00 27.71           H  
ATOM    774  HB3 ASN B  45     102.024  52.353  51.148  1.00 27.71           H  
ATOM    775 HD21 ASN B  45     104.146  53.243  51.055  1.00 27.71           H  
ATOM    776 HD22 ASN B  45     105.505  52.199  50.689  1.00 27.71           H  
ATOM    777  N   ASP B  46     101.024  53.851  53.370  1.00 -0.03           N  
ATOM    778  CA  ASP B  46      99.862  54.653  53.747  1.00 -0.03           C  
ATOM    779  C   ASP B  46      98.833  54.729  52.619  1.00 -0.03           C  
ATOM    780  O   ASP B  46      98.487  55.785  52.074  1.00 -0.03           O  
ATOM    781  CB  ASP B  46     100.282  56.042  54.201  1.00 -0.03           C  
ATOM    782  CG  ASP B  46      99.139  56.803  54.833  1.00 -0.03           C  
ATOM    783  OD1 ASP B  46      98.130  56.200  55.258  1.00 -0.03           O  
ATOM    784  OD2 ASP B  46      99.237  58.049  54.903  1.00 -0.03           O1-
ATOM    785  H   ASP B  46     101.808  54.329  52.929  1.00 -0.03           H  
ATOM    786  HA  ASP B  46      99.380  54.171  54.597  1.00 -0.03           H  
ATOM    787  HB2 ASP B  46     101.085  55.944  54.931  1.00 -0.03           H  
ATOM    788  HB3 ASP B  46     100.657  56.603  53.345  1.00 -0.03           H  
ATOM    789  N   SER B  47      98.354  53.551  52.268  1.00 43.48           N  
ATOM    790  CA  SER B  47      97.337  53.358  51.248  1.00 43.48           C  
ATOM    791  C   SER B  47      96.585  52.138  51.737  1.00 43.48           C  
ATOM    792  O   SER B  47      97.064  51.489  52.671  1.00 43.48           O  
ATOM    793  CB  SER B  47      98.001  53.111  49.885  1.00 43.48           C  
ATOM    794  OG  SER B  47      99.292  52.527  50.038  1.00 43.48           O  
ATOM    795  H   SER B  47      98.696  52.716  52.742  1.00 43.48           H  
ATOM    796  HA  SER B  47      96.659  54.205  51.195  1.00 43.48           H  
ATOM    797  HB2 SER B  47      97.367  52.467  49.275  1.00 43.48           H  
ATOM    798  HB3 SER B  47      98.120  54.069  49.378  1.00 43.48           H  
ATOM    799  HG  SER B  47      99.216  51.679  50.532  1.00 43.48           H  
ATOM    800  N   GLY B  48      95.450  51.823  51.125  1.00 35.33           N  
ATOM    801  CA  GLY B  48      94.827  50.521  51.312  1.00 35.33           C  
ATOM    802  C   GLY B  48      94.684  50.036  52.742  1.00 35.33           C  
ATOM    803  O   GLY B  48      94.123  50.729  53.601  1.00 35.33           O  
ATOM    804  H   GLY B  48      95.029  52.484  50.478  1.00 35.33           H  
ATOM    805  HA2 GLY B  48      93.851  50.507  50.830  1.00 35.33           H  
ATOM    806  HA3 GLY B  48      95.459  49.796  50.805  1.00 35.33           H  
ATOM    807  N   THR B  49      95.261  48.867  52.988  1.00 60.57           N  
ATOM    808  CA  THR B  49      95.317  48.250  54.316  1.00 60.57           C  
ATOM    809  C   THR B  49      93.931  48.021  54.920  1.00 60.57           C  
ATOM    810  O   THR B  49      93.522  48.665  55.893  1.00 60.57           O  
ATOM    811  CB  THR B  49      96.252  49.052  55.257  1.00 60.57           C  
ATOM    812  CG2 THR B  49      96.663  48.268  56.490  1.00 60.57           C  
ATOM    813  OG1 THR B  49      97.449  49.373  54.545  1.00 60.57           O  
ATOM    814  H   THR B  49      95.729  48.387  52.220  1.00 60.57           H  
ATOM    815  HA  THR B  49      95.771  47.269  54.195  1.00 60.57           H  
ATOM    816  HB  THR B  49      95.766  49.973  55.563  1.00 60.57           H  
ATOM    817  HG1 THR B  49      97.244  50.074  53.911  1.00 60.57           H  
ATOM    818 HG21 THR B  49      97.457  48.807  57.008  1.00 60.57           H  
ATOM    819 HG22 THR B  49      97.031  47.293  56.201  1.00 60.57           H  
ATOM    820 HG23 THR B  49      95.815  48.148  57.161  1.00 60.57           H  
ATOM    821  N   LEU B  50      93.199  47.088  54.327  1.00 -3.78           N  
ATOM    822  CA  LEU B  50      91.916  46.642  54.869  1.00 -3.78           C  
ATOM    823  C   LEU B  50      91.899  45.117  54.901  1.00 -3.78           C  
ATOM    824  O   LEU B  50      91.689  44.458  53.881  1.00 -3.78           O  
ATOM    825  CB  LEU B  50      90.736  47.164  54.045  1.00 -3.78           C  
ATOM    826  CG  LEU B  50      89.363  46.848  54.665  1.00 -3.78           C  
ATOM    827  CD1 LEU B  50      89.072  47.716  55.894  1.00 -3.78           C  
ATOM    828  CD2 LEU B  50      88.275  47.047  53.634  1.00 -3.78           C  
ATOM    829  H   LEU B  50      93.556  46.618  53.501  1.00 -3.78           H  
ATOM    830  HA  LEU B  50      91.818  47.005  55.890  1.00 -3.78           H  
ATOM    831  HB2 LEU B  50      90.827  48.243  53.934  1.00 -3.78           H  
ATOM    832  HB3 LEU B  50      90.783  46.718  53.053  1.00 -3.78           H  
ATOM    833  HG  LEU B  50      89.343  45.803  54.968  1.00 -3.78           H  
ATOM    834 HD11 LEU B  50      88.069  47.505  56.265  1.00 -3.78           H  
ATOM    835 HD12 LEU B  50      89.141  48.774  55.636  1.00 -3.78           H  
ATOM    836 HD13 LEU B  50      89.782  47.491  56.690  1.00 -3.78           H  
ATOM    837 HD21 LEU B  50      87.313  46.779  54.070  1.00 -3.78           H  
ATOM    838 HD22 LEU B  50      88.458  46.398  52.777  1.00 -3.78           H  
ATOM    839 HD23 LEU B  50      88.250  48.088  53.311  1.00 -3.78           H  
ATOM    840  N   ASP B  51      92.173  44.569  56.071  1.00  5.77           N  
ATOM    841  CA  ASP B  51      92.246  43.123  56.292  1.00  5.77           C  
ATOM    842  C   ASP B  51      91.611  42.793  57.637  1.00  5.77           C  
ATOM    843  CB  ASP B  51      93.717  42.695  56.262  1.00  5.77           C  
ATOM    844  CG  ASP B  51      93.908  41.194  56.419  1.00  5.77           C  
ATOM    845  OD1 ASP B  51      92.943  40.410  56.492  1.00  5.77           O  
ATOM    846  OD2 ASP B  51      95.087  40.772  56.423  1.00  5.77           O1-
ATOM    847  O'  ASP B  51      90.387  42.548  57.662  1.00  5.77           O  
ATOM    848  O'' ASP B  51      92.295  42.919  58.676  1.00  5.77           O  
ATOM    849  H   ASP B  51      92.353  45.172  56.871  1.00  5.77           H  
ATOM    850  HA  ASP B  51      91.702  42.589  55.514  1.00  5.77           H  
ATOM    851  HB2 ASP B  51      94.153  43.009  55.313  1.00  5.77           H  
ATOM    852  HB3 ASP B  51      94.253  43.203  57.063  1.00  5.77           H  
END
