# Supplementary material for: Structural Characterization of the Loop at the Alpha-Subunit C-Terminus of the Mixed Lineage Leukemia Protein Activating Protease Taspase1
Source: PLOS journal article supplement (doi:10.1371/journal.pone.0151431), 2016-03-14
Supplement: S2 (10.1371/journal.pone.0151431.s002) [file journal.pone.0151431.s002]

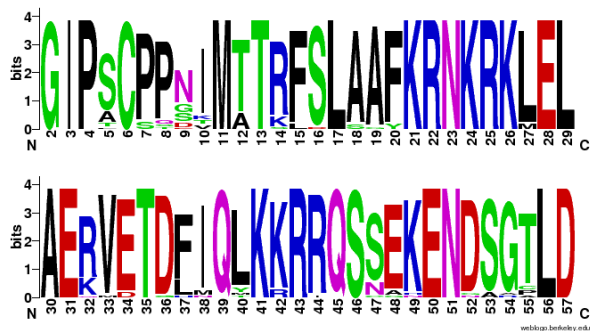

**S2 Fig. Conservation of the Taspase1 loop sequence.**

The sequence logo is based on a MUSCLE multiple sequence alignment of the loop regions of Taspase1 homologues from 32 species reveals high conservation. Blue: positively charged amino acids; green: neutral amino acids; black: hydrophobic amino acids; red: negatively charged amino acids.
