# Supplementary material for: Structural Characterization of the Loop at the Alpha-Subunit C-Terminus of the Mixed Lineage Leukemia Protein Activating Protease Taspase1
Source: PLOS journal article supplement (doi:10.1371/journal.pone.0151431), 2016-03-14
Supplement: S3 (10.1371/journal.pone.0151431.s003) [file journal.pone.0151431.s003]

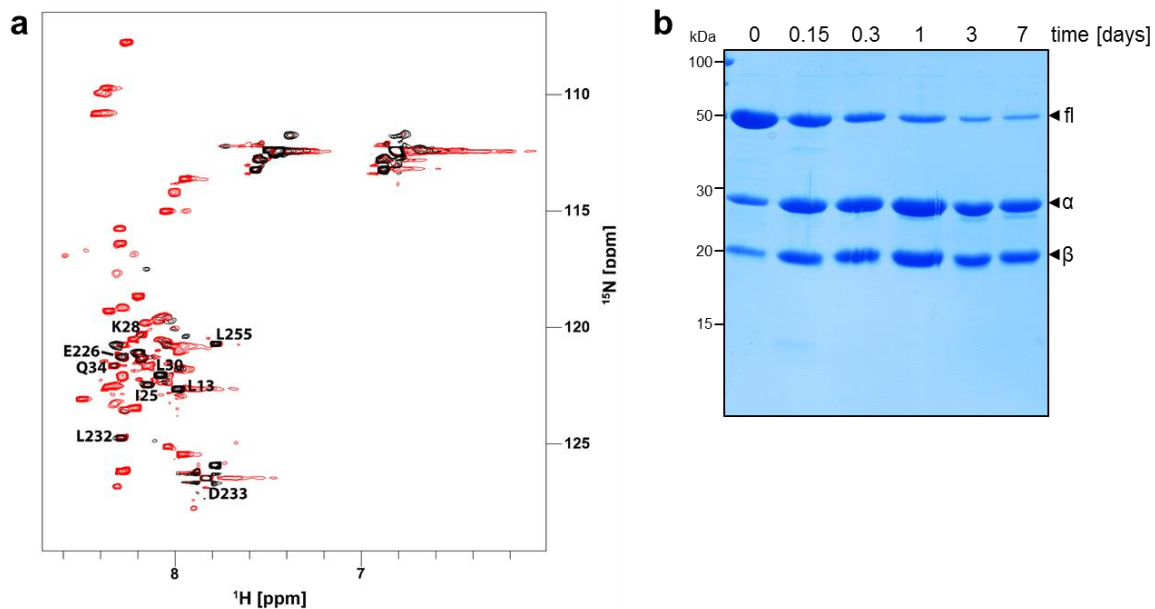

**S3 Fig. Time dependent appearance of Taspase1 signals in NMR spectra.**

**(a)**  $^1\text{H}$ - $^{15}\text{N}$  HSQC spectra of Taspase1 were recorded right after purification (black) and after one week incubation at 30 °C (red). Peaks of the spectrum right after purification are labeled. **(b)** SDS-PAGE analysis of Taspase1 samples after incubation at 37 °C shows autocatalytic processing of full-length (fl) Taspase1 to  $\alpha$  and  $\beta$  subunits. Note that no further degradation is visible.
